# Supplementary material for: Anchored Phylogenomics, Evolution and Systematics of Elateridae: Are All Bioluminescent Elateroidea Derived Click Beetles?
Source: MDPI journal article supplement (doi:10.3390/biology10060451), 2021-05-21
Supplement: s1 [file s1]

```

    || Function to return cell shading of branch  $n_a$  (in preferred tree  $t_a$ ), given topology of alternate tree  $t_b$ 
function colour_cell (node  $n_a$ , tree  $t_b$ ) -> colour
    let  $s_a$  = set of all terminals apical to  $n_a$ 
    let  $n_b$  = most recent common ancestor of all  $s_a$  in  $t_b$ 
    let  $s_b$  = set of all terminals apical to  $n_b$ 
    if (size of  $s_a$  == size of  $s_b$ ) then :
        | Nodes are equivalent in both trees
        return colour corresponding to confidence of  $n_b$  in  $t_b$ 
    else :
        let  $t_x$  = collapse_tree( $n_b$ )
        let  $s_x = s_b - s_a$ 
        for each child  $i$  of  $t_x$  :
            let  $s_i$  = set of all terminals apical to  $i$ 
            if ( $s_i$  is a subset of  $s_x$ ) then :
                remove  $i$  from  $t_x$ 
                let  $s_x = s_x - s_i$ 
            end if
        end for each
        if (size of  $s_x > 0$ ) then :
            | Could not split extra terminals under node  $n_b$  into their own branch
            return colour corresponding to strongly-supported alternate topology
        end if
        for each child  $i$  of  $n_a$  :
            let  $s_i$  = set of all terminals apical to  $i$ 
            for each child  $j$  of  $t_x$  :
                let  $s_j$  = set of all terminals apical to  $j$ 
                if ( $s_j$  is a subset of  $s_i$ ) then :
                    remove  $j$  from  $t_x$ 
                    let  $s_i = s_i - s_j$ 
                end if
            end for each
            if (size of  $s_i > 0$ ) then :
                | Could not separate terminals of branch under  $n_a$  from collapsed sub-tree under  $n_b$ 
                return colour corresponding to strongly-supported alternate topology
            end if
        end for each
        | Equivalent node was recovered after splitting off extra terminals
        return colour corresponding to weakly-supported node
    end if
end function

    || Function to return an equivalent tree to a sub-tree starting from node  $n$  with all nodes with weak confidence collapsed (removed)
function collapse_tree(node  $n$ ) -> tree
    let result = empty tree
    if (confidence of  $n$  is strong) then :
        for each child  $i$  of  $n$  :
            add collapse_tree( $i$ ) as child of result
        end for each
    else :
        for each child  $i$  of  $n$  :
            let  $t_x$  = collapse_tree( $i$ )
            for each child  $j$  of  $t_x$  :
                add  $j$  as child of result
            end for each
        end for each
    end if
    return result
end function

```

Supplementary File S3 Pseudocode presenting the algorithm used to determine the branch support cell shading at nodes in figures 2 and 3
