# Supplementary material for: Anchored Phylogenomics, Evolution and Systematics of Elateridae: Are All Bioluminescent Elateroidea Derived Click Beetles?
Source: MDPI journal article supplement (doi:10.3390/biology10060451), 2021-05-21
Supplement: s1 [file s1]

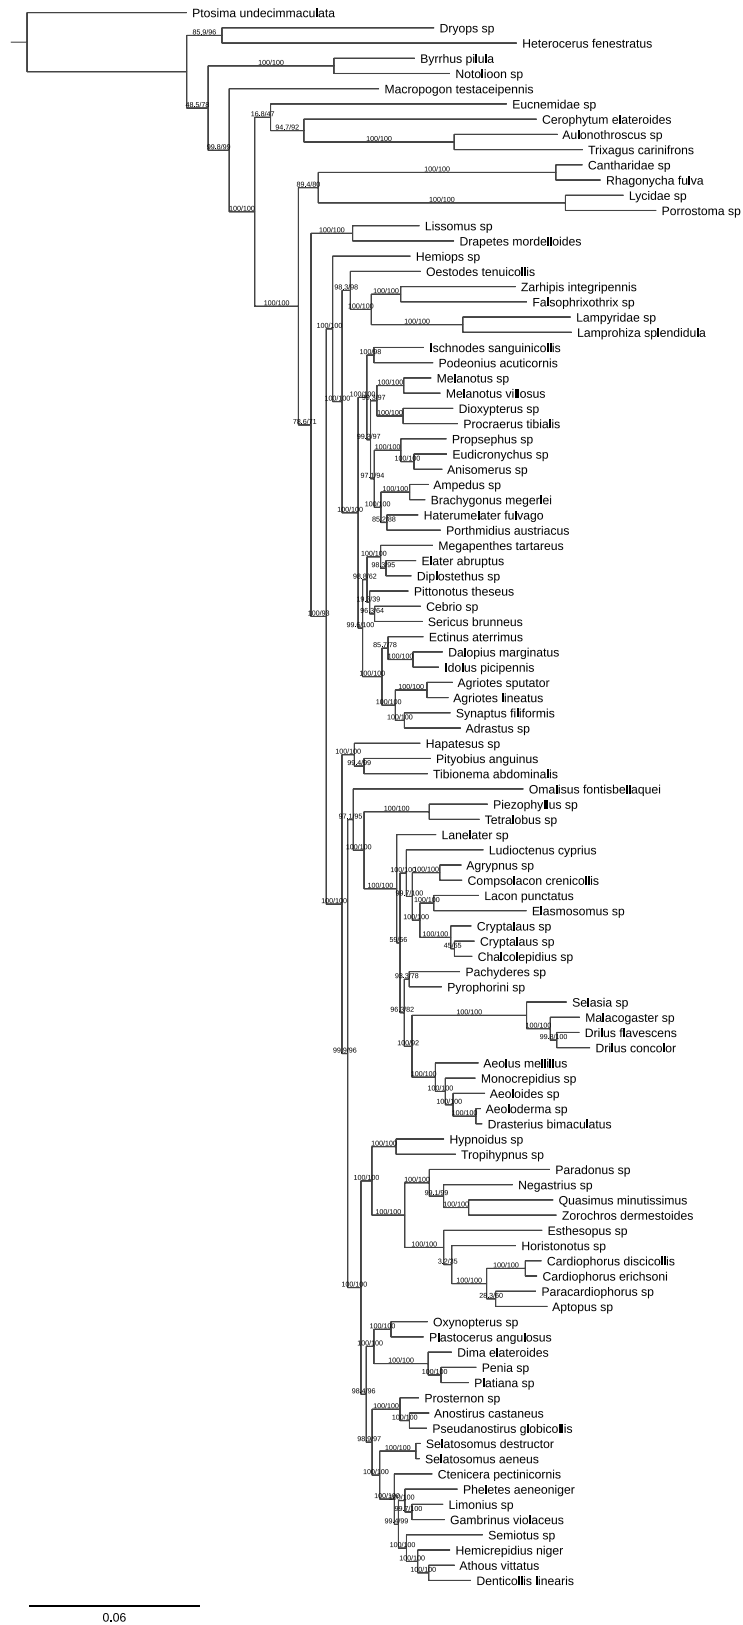

Phylogeny inferred from maximum likelihood analysis of unpartitioned, concatenated amino acid data, 50% completeness matrix (50CU-AA)

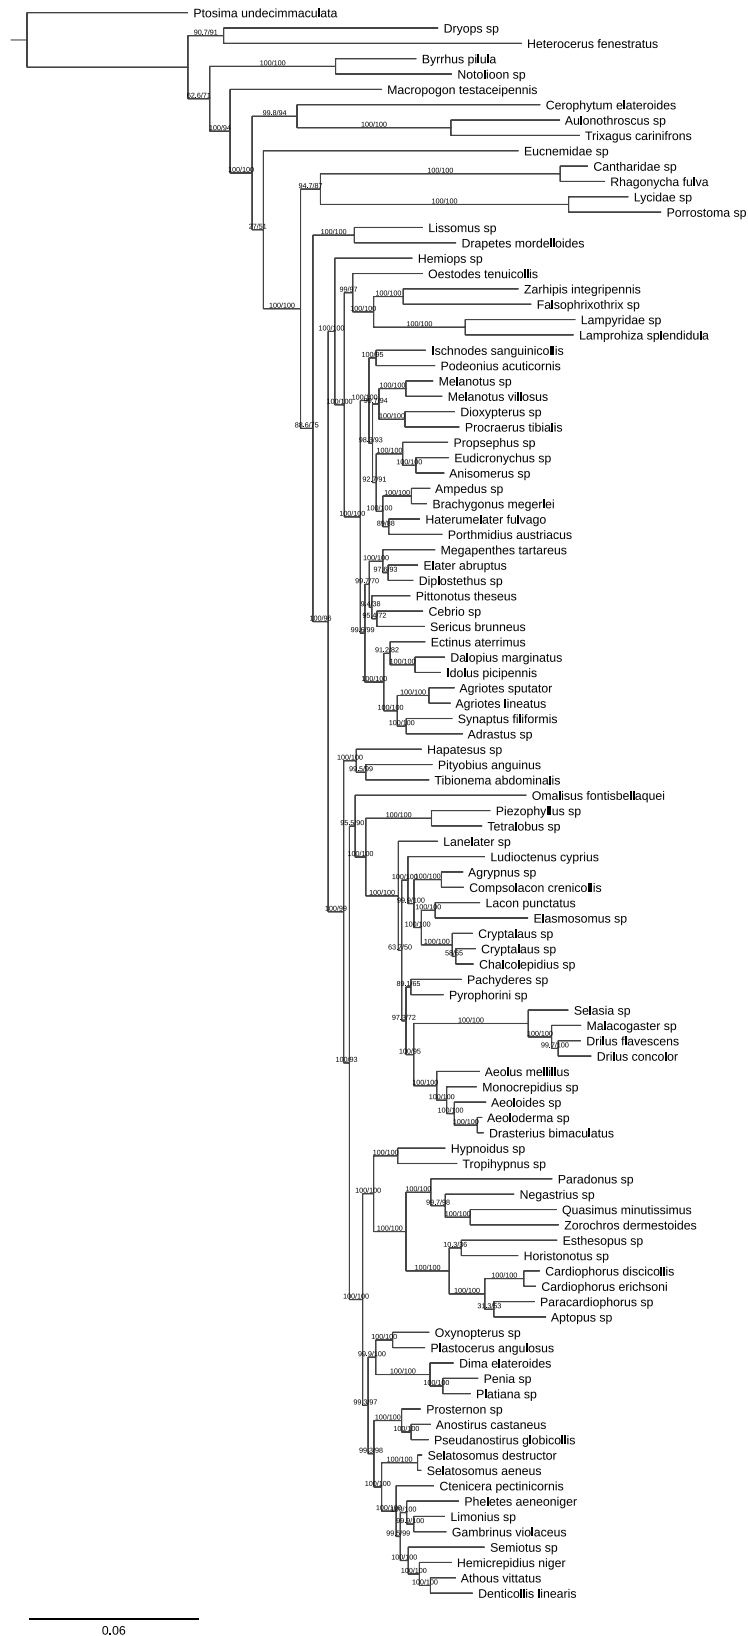

Phylogeny inferred from maximum likelihood analysis of partitioned, concatenated amino acid data, 50% completeness matrix (50CP-AA)

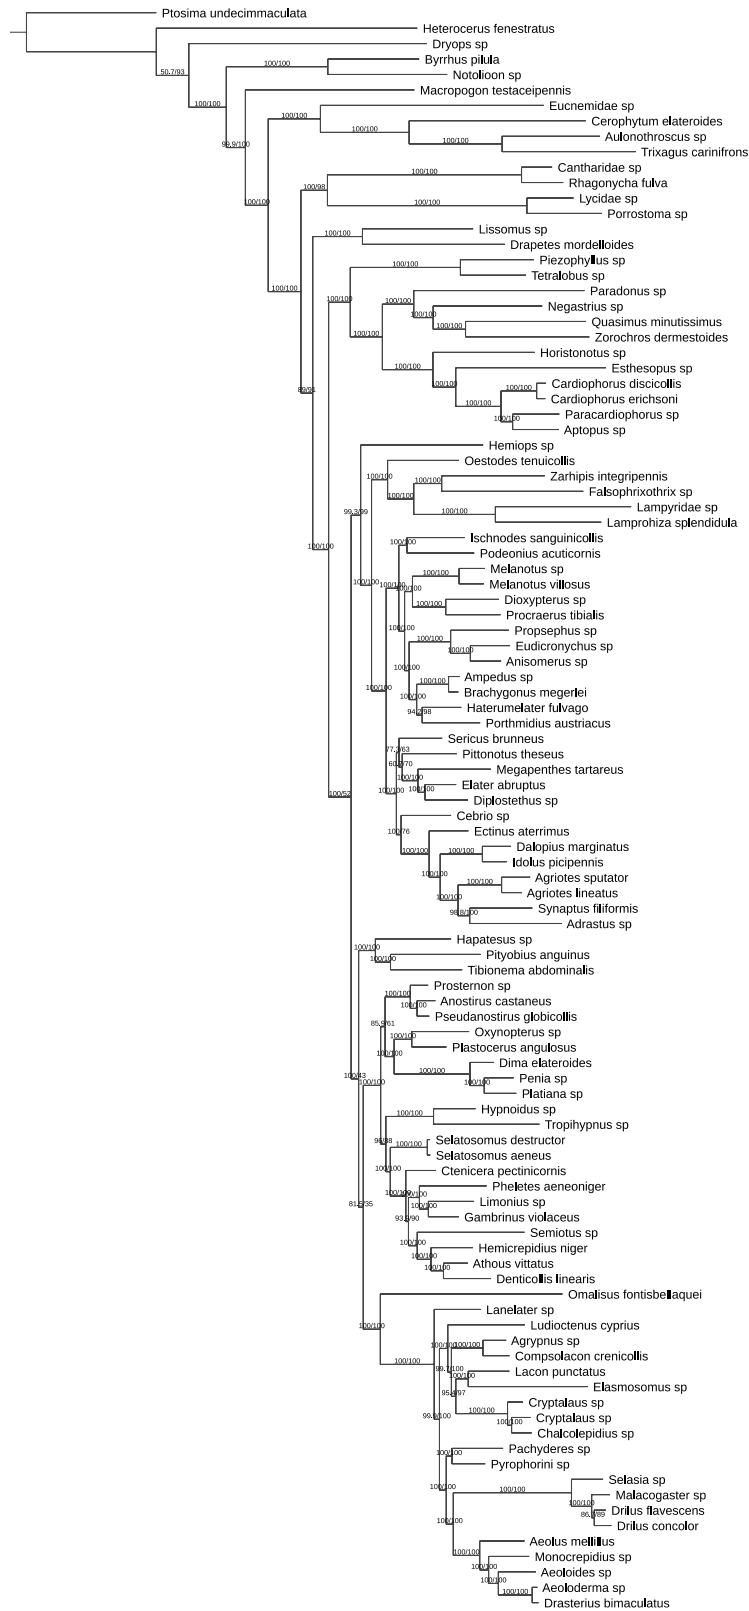

Phylogeny inferred from maximum likelihood analysis of unpartitioned, concatenated nucleotide data, 50% completeness matrix (50CU)

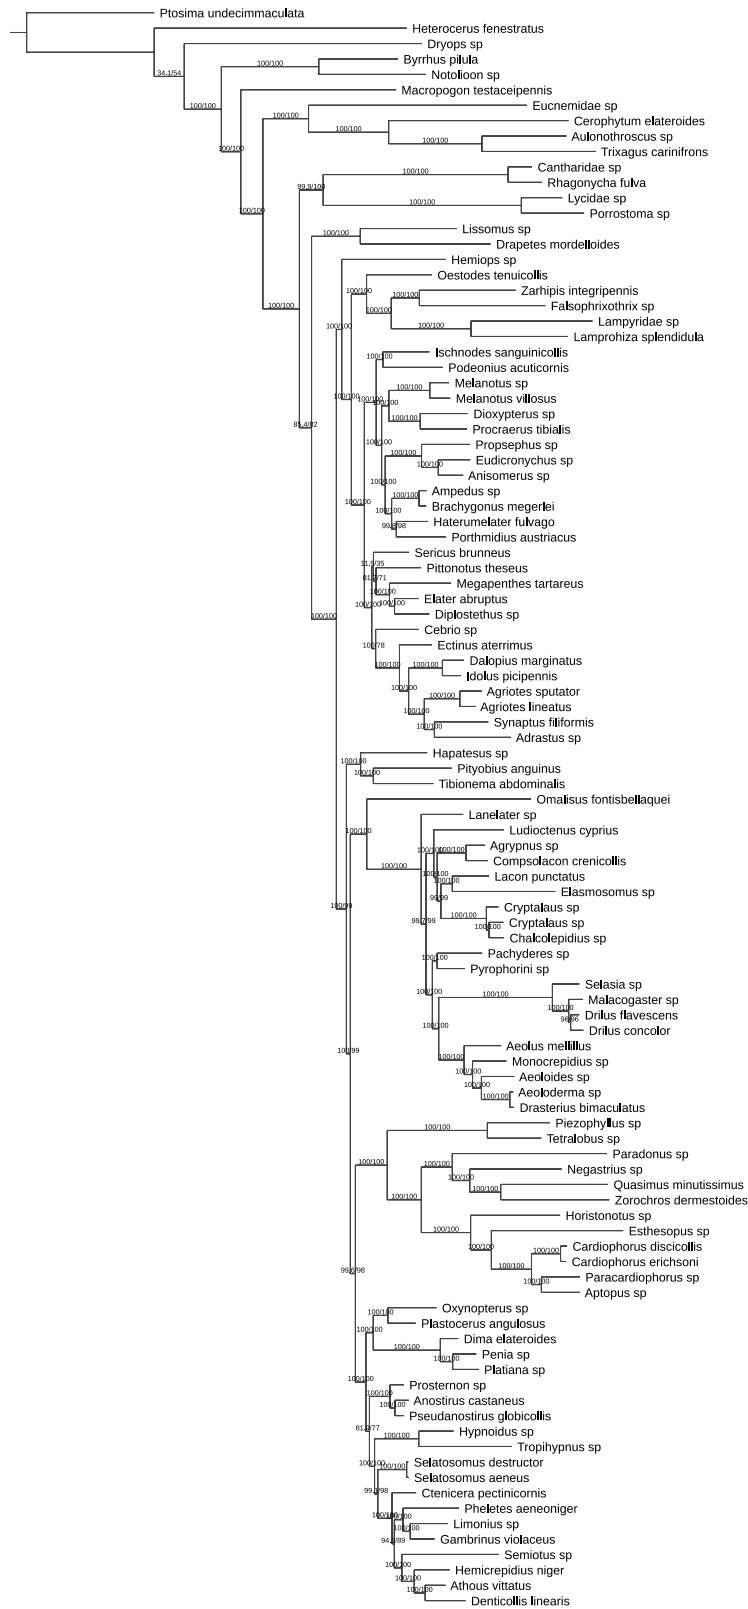

0,5

Phylogeny inferred from maximum likelihood analysis of partitioned, concatenated nucleotide data, 50% completeness matrix (50CP)

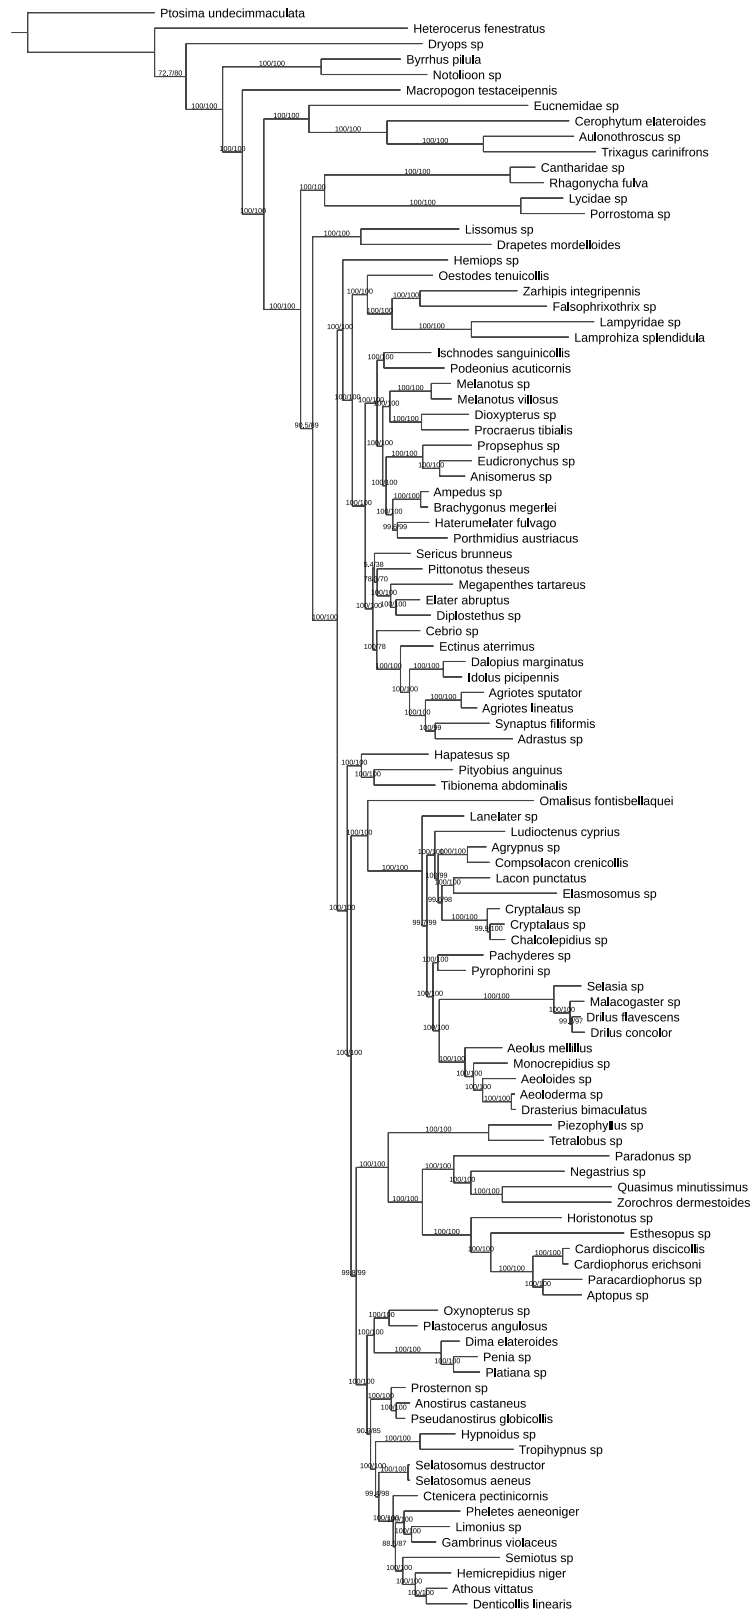

Phylogeny inferred from maximum likelihood analysis of partitioned, concatenated nucleotide data with flanking regions added, 50% completeness matrix (50CPF)

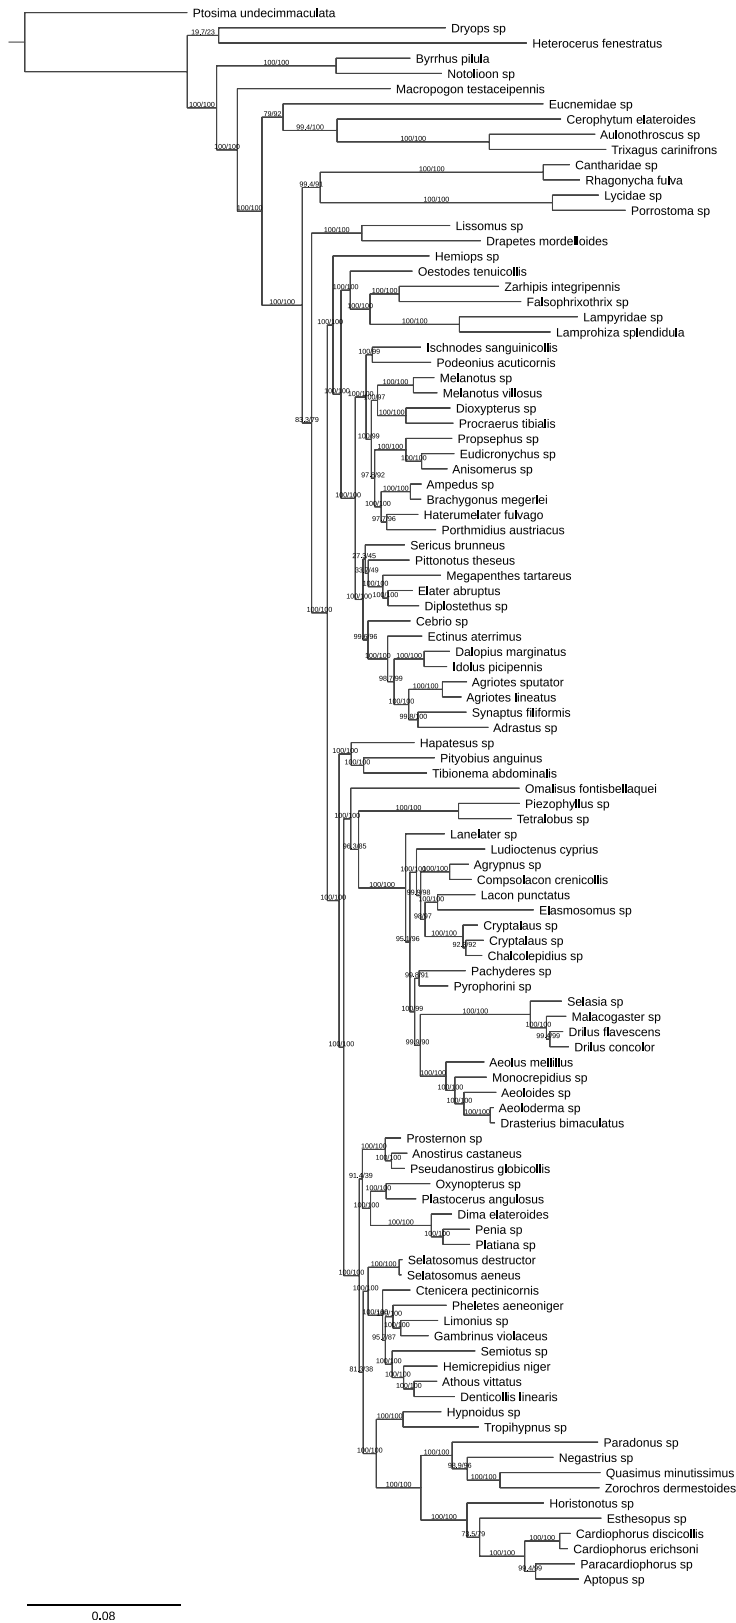

Phylogeny inferred from maximum likelihood analysis of partitioned, concatenated nucleotide data with flanking regions added and third codon positions removed, 50% completeness matrix (50CPF-No3)

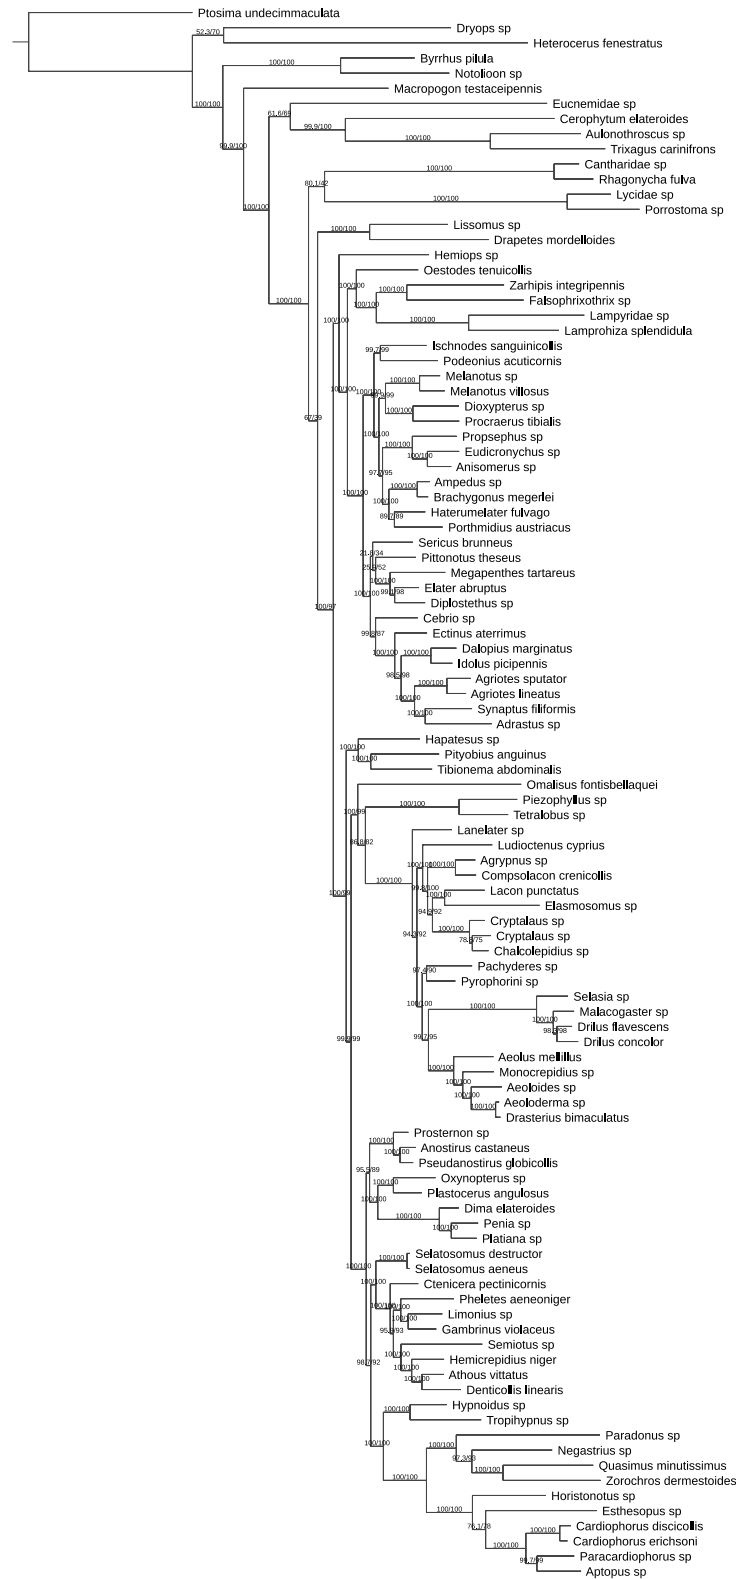

Phylogeny inferred from maximum likelihood analysis of unpartitioned, concatenated nucleotide data with third codon positions removed, 50% completeness matrix (50CU-No3)

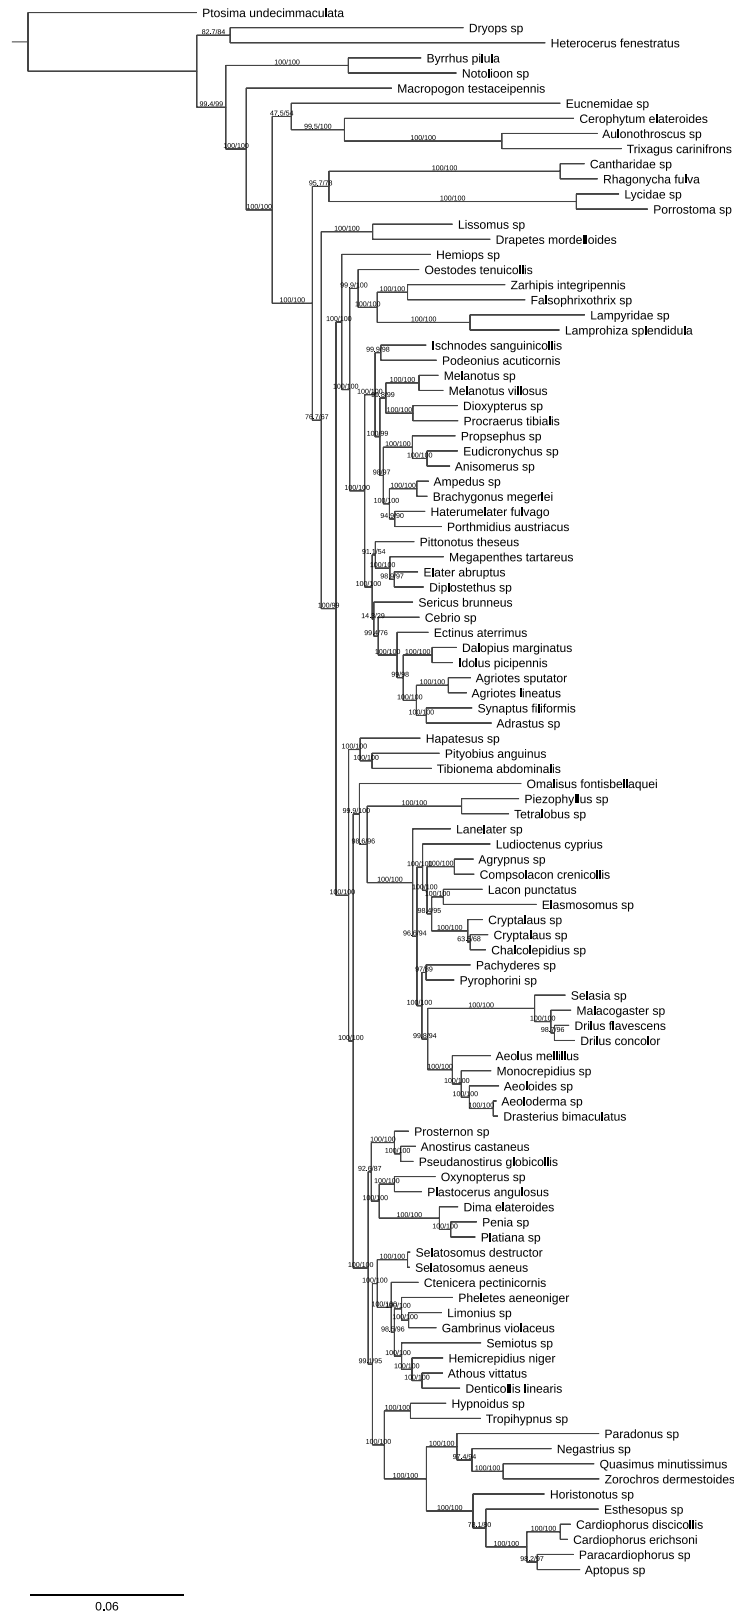

Phylogeny inferred from maximum likelihood analysis of partitioned, concatenated nucleotide data with third codon positions removed, 50% completeness matrix (50CP-No3)



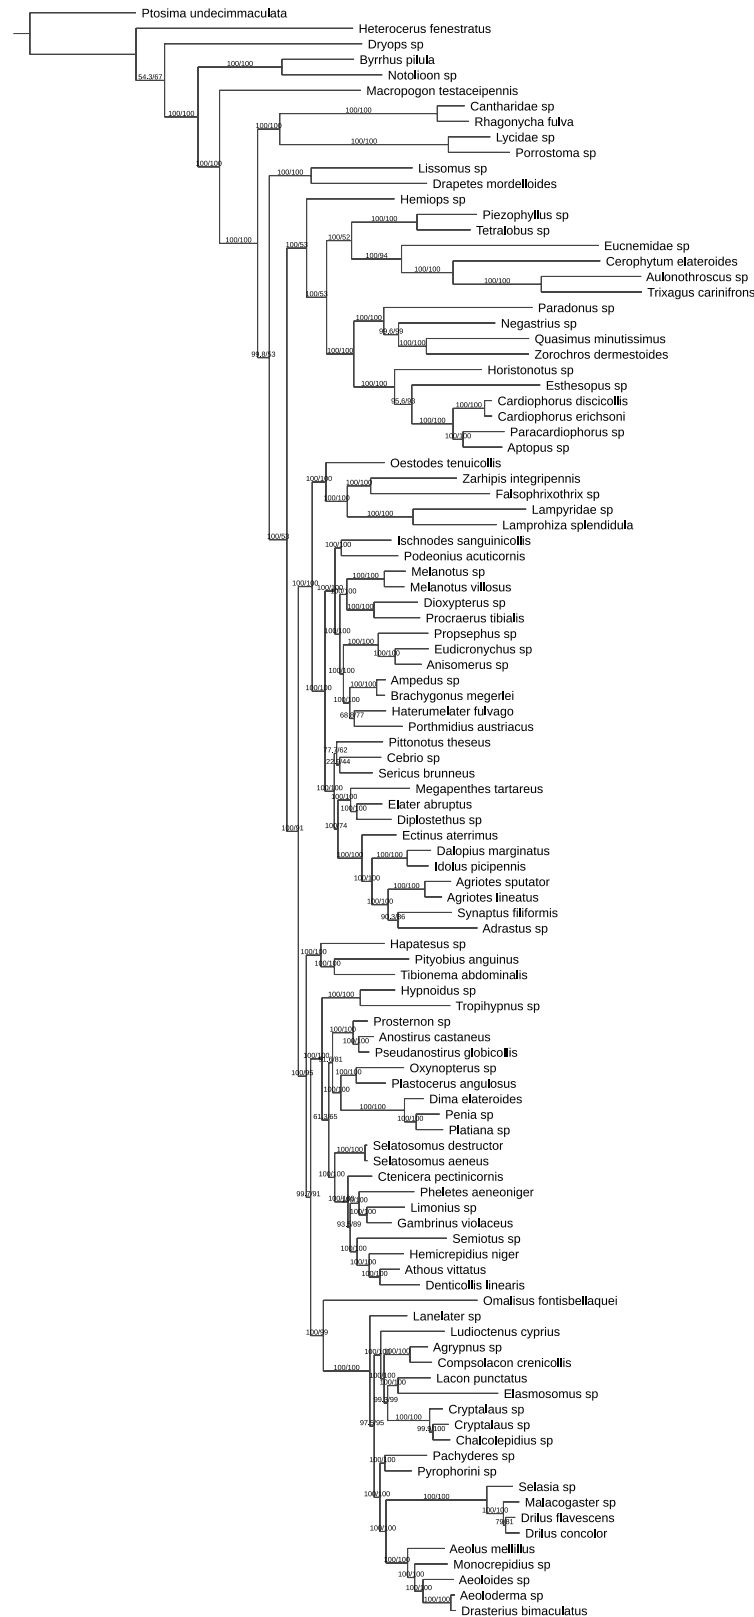

Phylogeny inferred from maximum likelihood analysis of partitioned, concatenated nucleotide data with flanking regions added, 75% completeness matrix (75CPF)

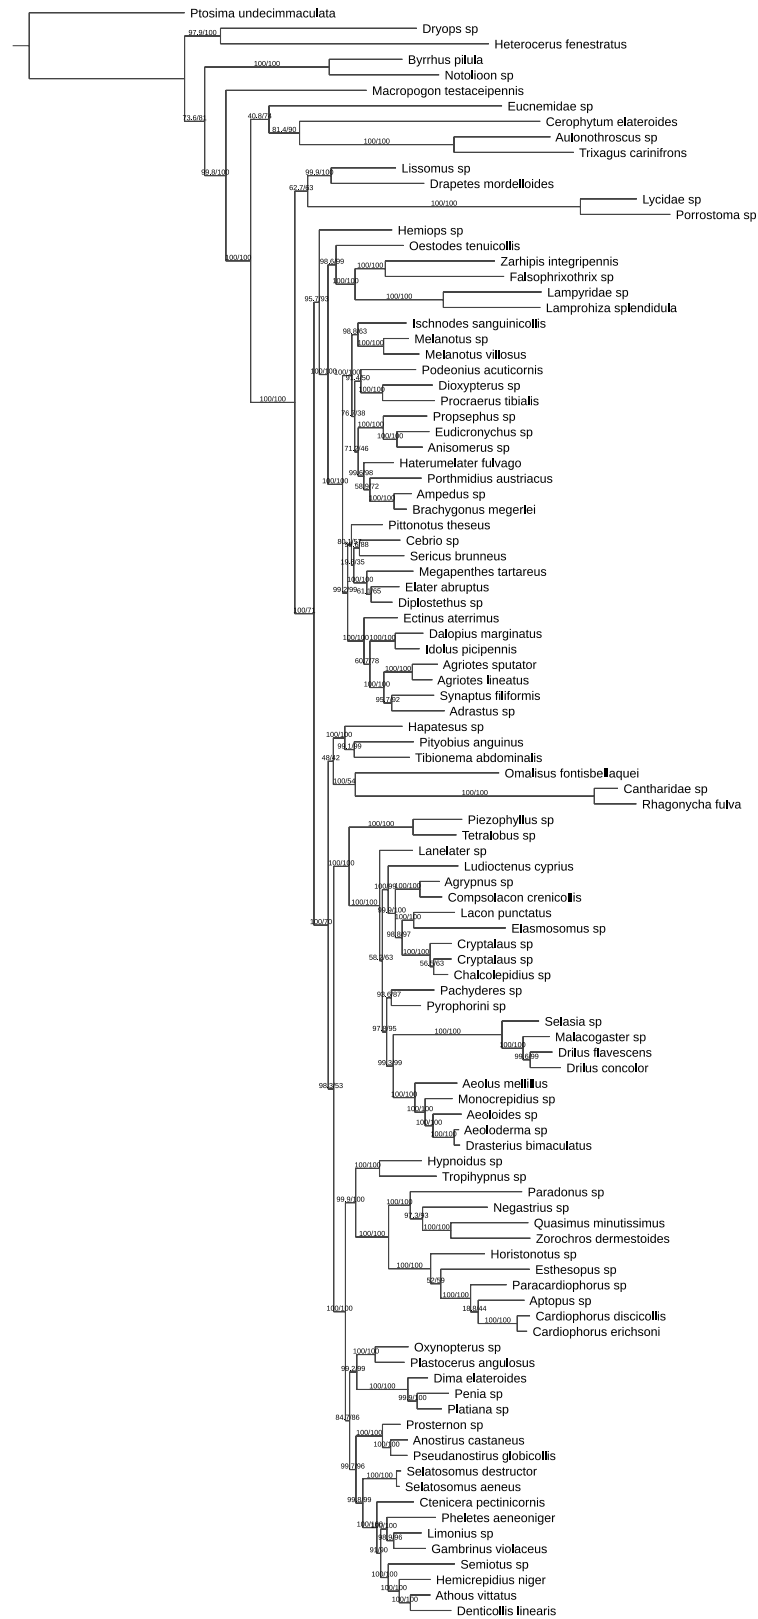

Phylogeny inferred from maximum likelihood analysis of unpartitioned, concatenated amino acid data, 75% completeness matrix (75CU-AA)

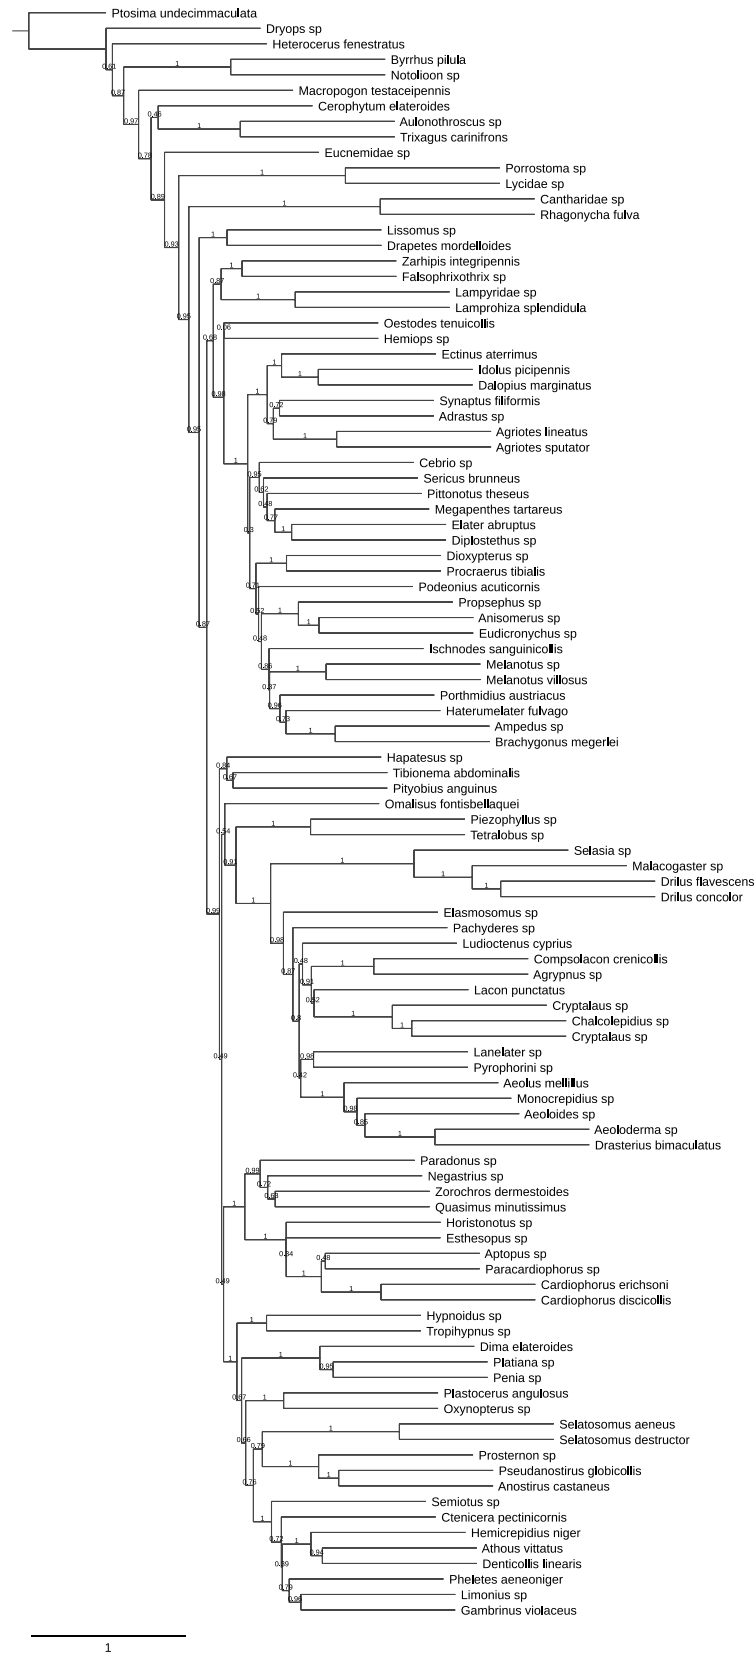

Phylogeny inferred from coalescent analysis (ASTRAL-III) of amino acid data, 50% completeness matrix (Astral50-AA)

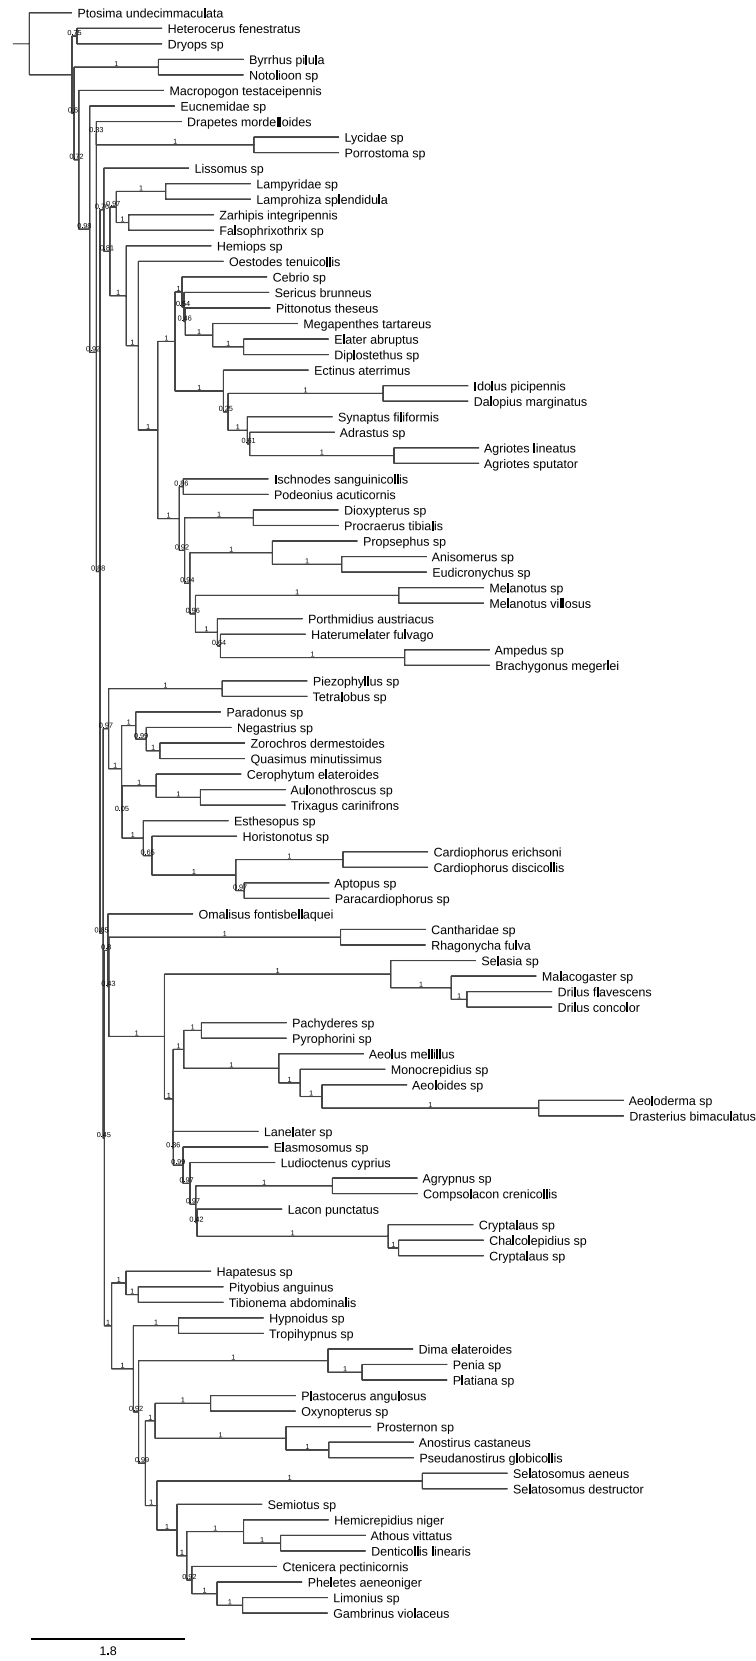

Phylogeny inferred from coalescent analysis (ASTRAL-III) of nucleotide data, 50% completeness matrix (Astral50)
